# Supplementary material for: A20, an essential component of the ubiquitin-editing protein complex, is a negative regulator of inflammation in human myometrium and foetal membranes
Source: Oxford University Press journal article supplement (doi:10.1093/molehr/gax041), 2017-07-18
Supplement: gax041_A20andhumanlabour_SupplementaryFigure1_Submission1.docx [file gax041_A20andhumanlabour_SupplementaryFigure1_Submission1.docx]

**

**

**Supplementary Figure 1. Efficacy of siA20 knockdown**

Human primary **(A,B)** myometrial and **(C,D)** amnion cells were transfected with 50 nM siCONT or 50 nM siA20 for 48 h (n=5 patients). **(A,C)** A20 protein expression was assessed by Western blotting and the fold change was calculated relative to the siCONT transfected cells (n=5 patients). Data is displayed as mean ± SEM. **P*<0.05 vs. siCONT (one-sample t-test). Representative Western blot images from 1 patient is also shown. **(B,D)** Cell viability was assessed using a MTT assay and the fold change was calculated relative to the siCONT transfected cells. Data is displayed as mean ± SEM.
